# Supplementary material for: Chronic myeloid leukemia stem cells require cell-autonomous pleiotrophin signaling
Source: JCI journal article supplement (doi:10.1172/jci129061), 2019-10-15
Supplement: sd1 [file 1]

## Supplemental Data

A

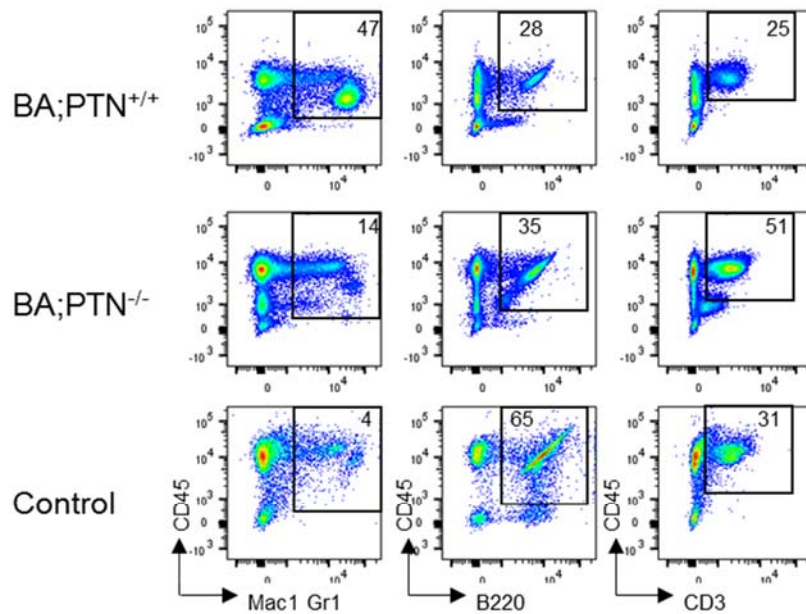

B

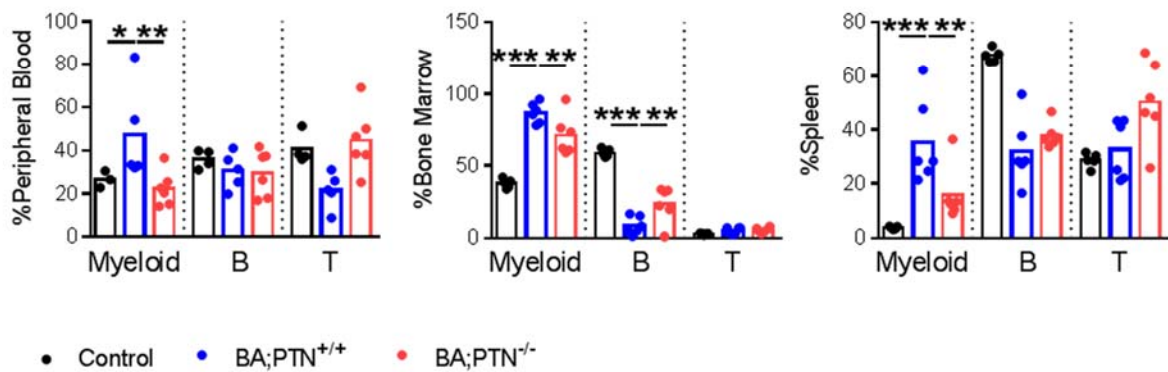

### Supplemental Figure 1. PTN deletion decreases myeloid skewing in BA mice.

(A) Representative flow cytometric analyses of Mac1<sup>+</sup>/Gr1<sup>+</sup> myeloid cells, B220<sup>+</sup> B cells, and CD3<sup>+</sup> T cells in the spleens of BA;PTN<sup>+/+</sup> mice, BA;PTN<sup>-/-</sup> mice and C57BL/6 mice (controls) at 12 weeks post – BCR/ABL induction. (B) Percentages of myeloid cells, B cells and T cells at 12 weeks post – BCR/ABL induction in the PB, BM, and spleens of the mice groups shown ( $n=6$ /group). Tukey's multiple comparison test for two-way ANOVA. \*  $P < 0.05$ , \*\*  $P < 0.01$ , \*\*\*  $P < 0.001$ .

A

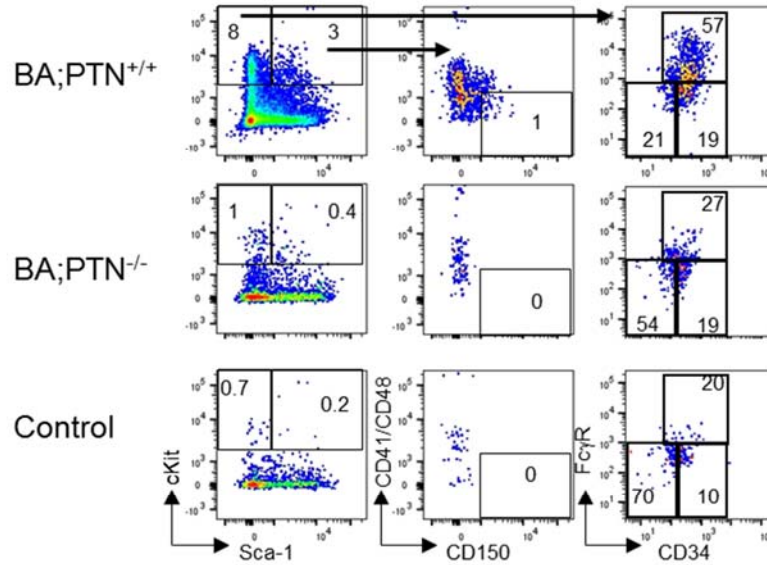

B

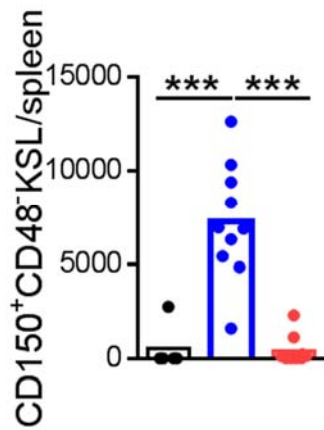

C

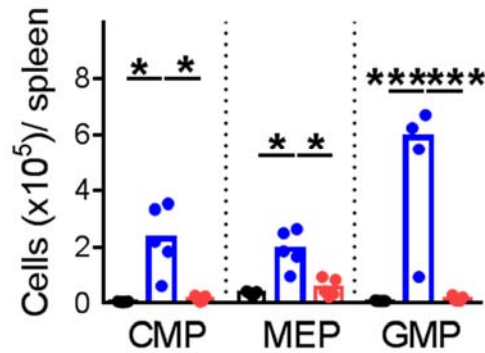

• Control • BA;PTN<sup>+/+</sup> • BA;PTN<sup>-/-</sup>

**Supplemental Figure 2. PTN deletion decreases CML stem cell enrichment in BA mice.** (A) Representative flow cytometric analyses of KSL cells, CD150<sup>+</sup>CD48<sup>-</sup>/41<sup>-</sup>KSL cells and myeloid progenitor cell populations in the spleens of BA;PTN<sup>+/+</sup> mice and BA;PTN<sup>-/-</sup> mice at 12 weeks post – BCR/ABL induction, and controls. FcγR<sup>+</sup>CD34<sup>+</sup> cells are GMPs, FcγR<sup>-</sup>CD34<sup>-</sup> cells are MEPs, and FcγR<sup>+</sup>CD34<sup>+</sup> cells are CMPs. (B) Numbers of CD150<sup>+</sup>CD48<sup>-</sup>KSL cells in the spleens of BA;PTN<sup>+/+</sup> mice, BA;PTN<sup>-/-</sup> mice and controls ( $n=5-10$ /group). Tukey's multiple comparison test for one-way ANOVA. (C) Numbers of MEPs, CMPs, and GMPs in the groups shown at 12 weeks post-BCR/ABL induction ( $n=5$ /group). Tukey's multiple comparison test for two-way ANOVA. \*  $P < 0.05$ , \*\*\*  $P < 0.001$ .

A

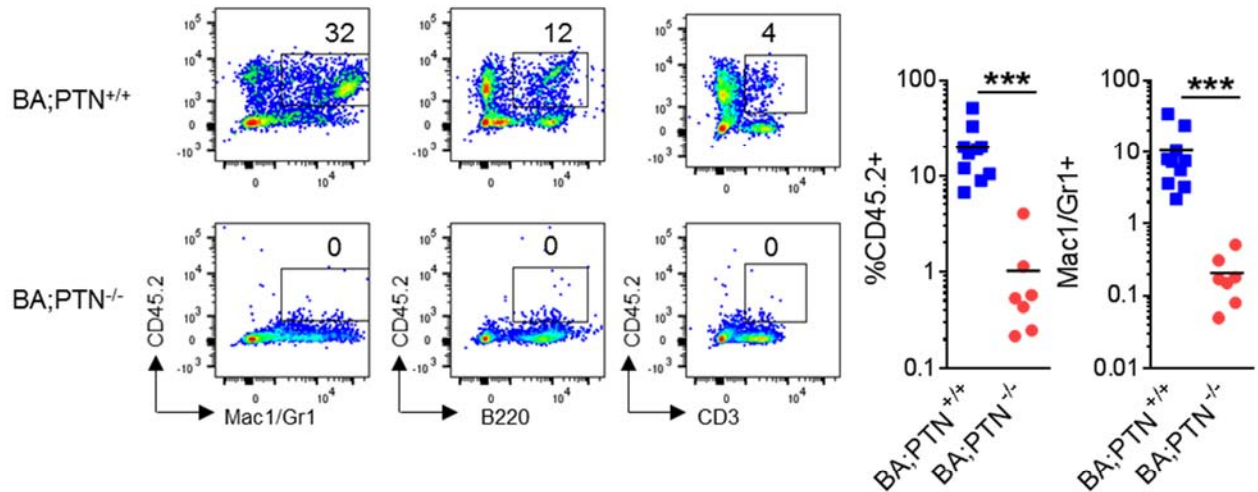

B

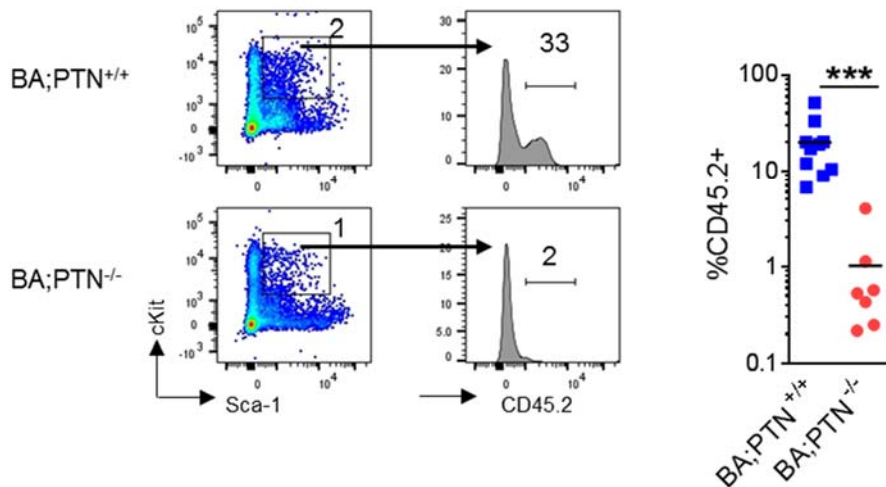

**Supplemental Figure 3. PTN deletion decreases CML stem cell repopulating capacity.**

(A) At left, representative flow cytometric analysis of donor CD45.2<sup>+</sup> myeloid, B cell, and T cell engraftment in the spleens of recipient (CD45.1<sup>+</sup>) mice at 10 weeks following transplantation with KSL cells from BA;PTN<sup>+/+</sup> mice or BA;PTN<sup>-/-</sup> mice. At right, percentage donor CD45.2<sup>+</sup> cells and donor myeloid cell engraftment ( $n=7-9$ /group); 2-sided Student's t test. (B) At left, representative flow cytometric analysis of donor CD45.2<sup>+</sup> cell engraftment at 10 weeks within the splenic KSL population in recipient mice transplanted with KSL cells from BA;PTN<sup>+/+</sup> mice or BA;PTN<sup>-/-</sup> mice. At right, %CD45.2<sup>+</sup>KSL cells in the spleen of the recipient mice shown ( $n=7-9$  per group); 2-sided Student's t test. \*\* $P < 0.01$ , \*\*\* $P < 0.001$ .

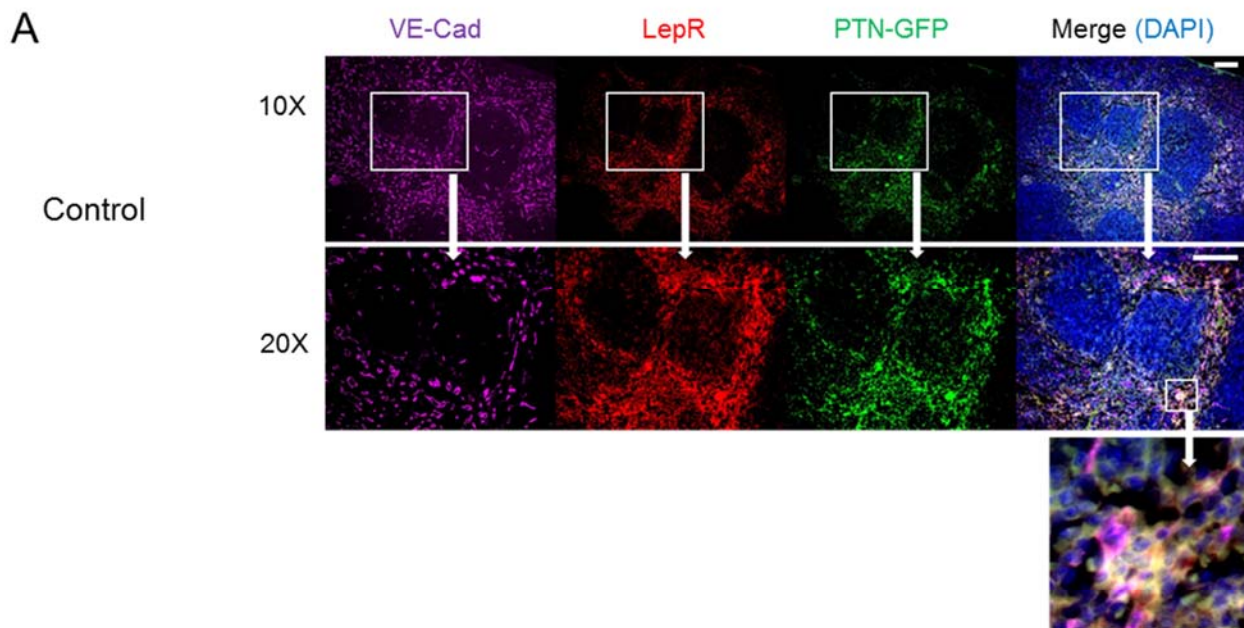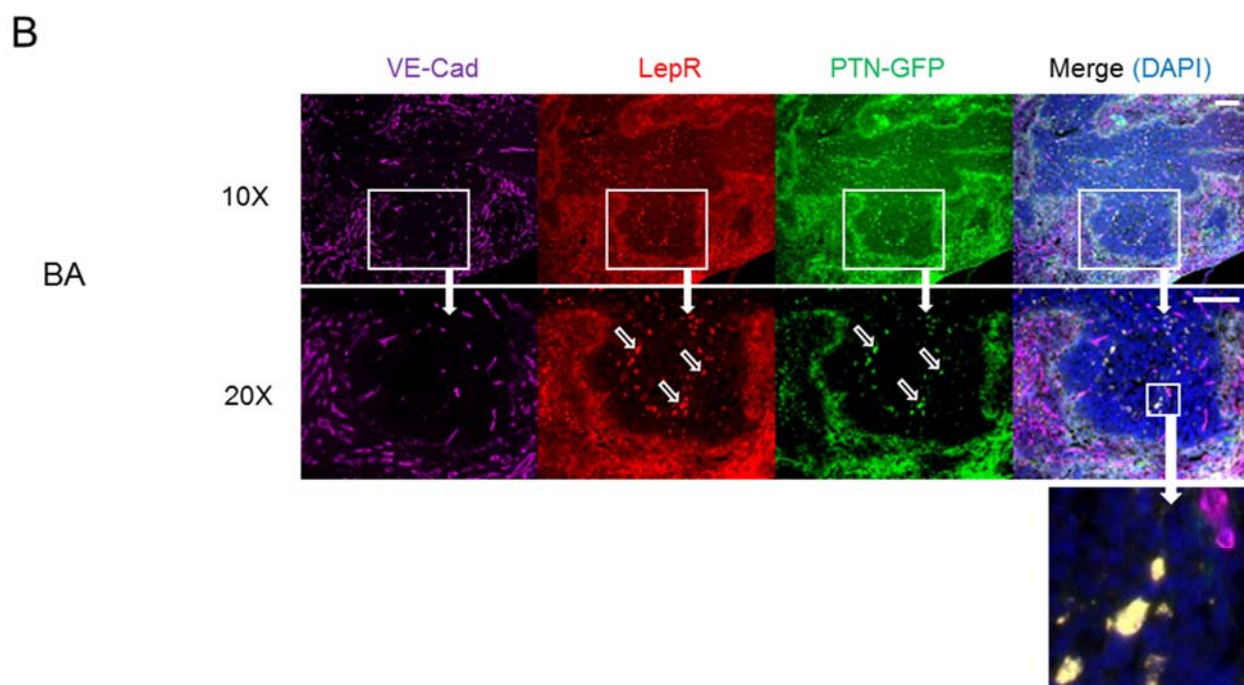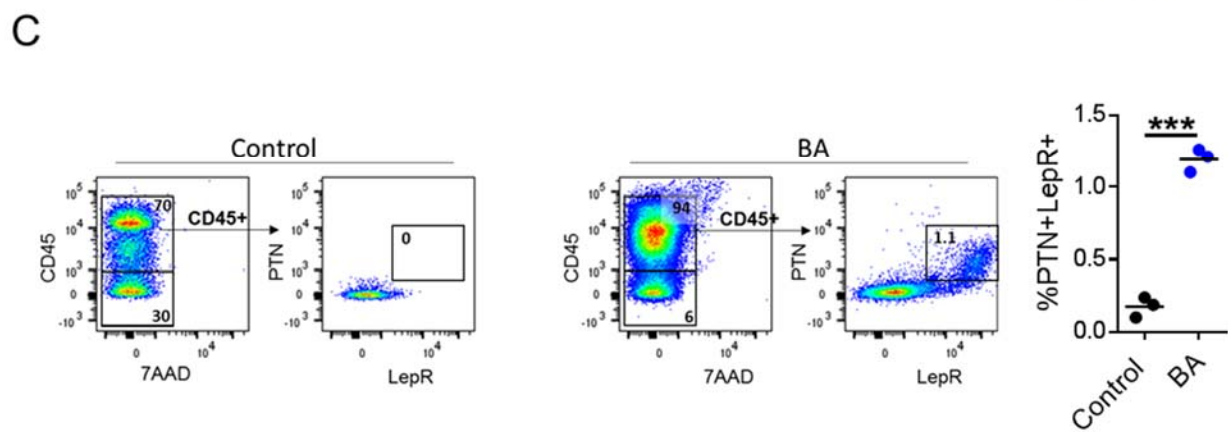

**Supplemental Figure 4. A subset of CD45<sup>+</sup> cells express PTN and LepR in BA mice.**

(A) Cross sections of spleens of PTN-GFP control mice are shown. Magnification of each image shown at left. In control mice, PTN expression (green) co-localized with VEcad<sup>+</sup> ECs (magenta) and LepR<sup>+</sup> stromal cells (red) in the red pulp region. Nuclei were counterstained with DAPI. The inset box shows a further magnified, merged image revealing the co-localization of PTN expression with LepR<sup>+</sup> cells and VEcad<sup>+</sup> ECs (yellow). (B) Cross sections of BA;PTN-GFP mice (BA) at 12 weeks following *BCR/ABL* induction. Corruption of the normal splenic architecture is demonstrated. In the highlighted region (inset box, 10x), PTN expression co-localized with LepR<sup>+</sup> cells (white arrows, 20x images) and was distinct from VEcad<sup>+</sup> vascular structures. The magnified, merged image displays PTN-expressing cells co-localized with LepR expression (yellow). (C) Representative flow cytometric analysis of expression of PTN and LepR in the splenic CD45<sup>+</sup> population of control mice and BA mice at 12 weeks following *BCR/ABL* induction. At right, percentages of PTN<sup>+</sup>LepR<sup>+</sup> cells within the CD45<sup>+</sup> population are shown for each group ( $n=3$  mice/ group); 2-sided Student's t test. \*\*\* $P < 0.001$ .

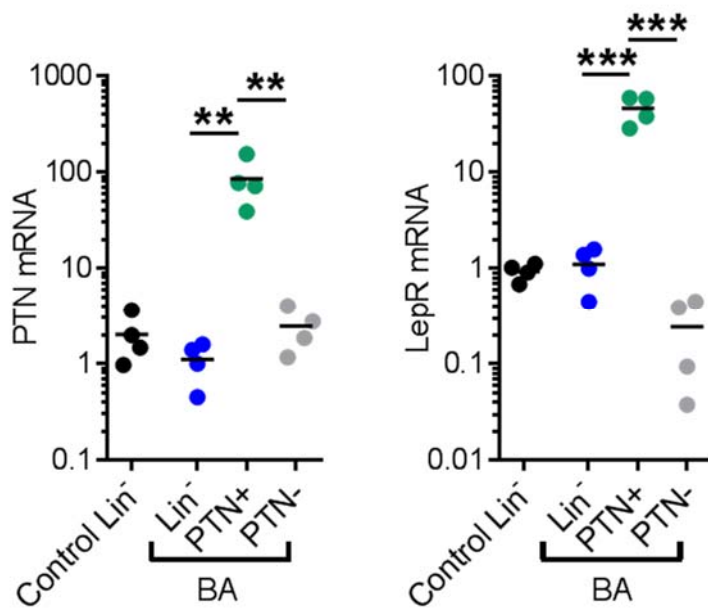

**Supplemental Figure 5. PTN<sup>+</sup> cells in the spleen of BA mice are enriched for *LepR* expression.** At left, *Ptn* gene expression is shown in the cell populations shown from the spleens of PTN-GFP (control) mice and from BA;PTN-GFP mice (BA) at 12 weeks post-*BCR/ABL* induction. At right, *LepR* gene expression is shown in the same splenic cell populations ( $n=4$  mice/group); Dunnett's multiple comparison test for one-way ANOVA. \*\*  $P < 0.01$ , \*\*\*  $P < 0.001$ .

A

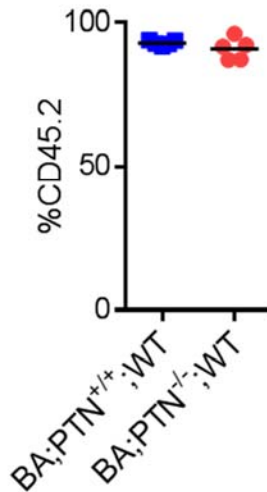

B

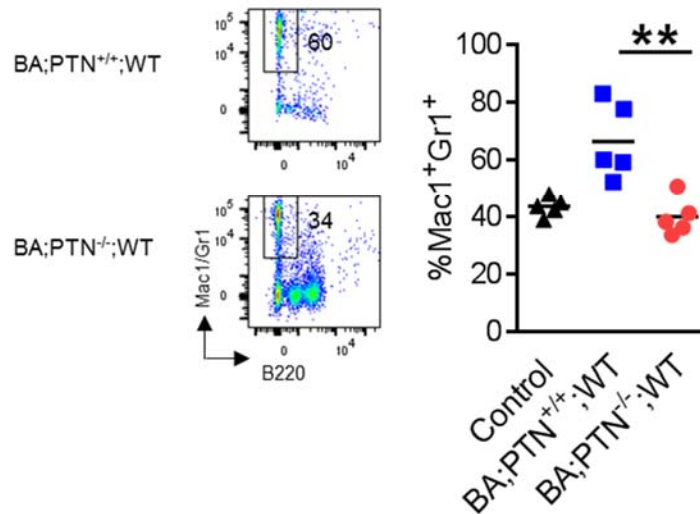

**Supplemental Figure 6. Hematopoietic cell – specific deletion of PTN abrogates CML pathogenesis in vivo.** (A) Donor hematopoietic cell engraftment at 4 weeks post-transplant in chimeric mouse model ( $n=5/\text{group}$ ). (B) At left, representative flow cytometric analysis of Mac1<sup>+</sup>/Gr1<sup>+</sup> myeloid cells in the BM of wild type (WT) mice transplanted with BM cells from BA;PTN<sup>+/+</sup> mice or BA;PTN<sup>-/-</sup> mice, at 16 weeks post-BCR/ABL induction. At right, percentages of Mac1<sup>+</sup>/Gr1<sup>+</sup> cells in the BM of BA;PTN<sup>+/+</sup>;WT mice and BA;PTN<sup>-/-</sup>;WT mice are shown, compared to adult B6.SJL mice controls ( $n=5/\text{group}$ ). Student's t test. \*\*  $P < 0.01$ .

A

| Gene Symbol | Fold Change              | p-value |
|-------------|--------------------------|---------|
|             | (BA;PTN-/- vs BA;PTN+/+) |         |
| Jun         | -2.2                     | 0.002   |
| Jak2        | -1.58                    | 0.004   |
| Mlh1        | -1.59                    | 0.012   |
| Lmo2        | -1.92                    | 0.014   |
| Il12a       | -2.98                    | 0.023   |
| Cdc42ep3    | -1.54                    | 0.025   |
| Cdkn1a      | -1.85                    | 0.033   |
| Grb2        | -1.32                    | 0.040   |
| Akt1        | -1.73                    | 0.046   |

B

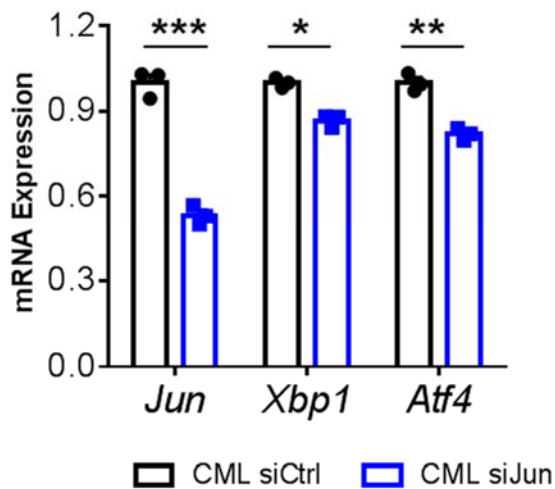

C

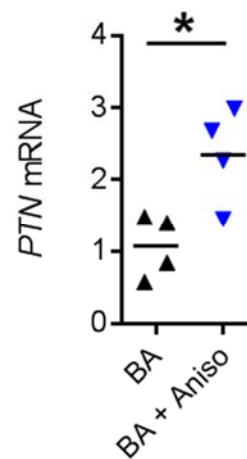

**Supplemental Figure 7. PTN induces *Jun* and *UPR* gene expression.** (A) The table shows the genes downregulated by at least 1.5-fold in KSL cells from BA;PTN<sup>-/-</sup> mice versus BA;PTN<sup>+/+</sup> mice ( $P < 0.05$ ). *Jak2* = janus kinase 2, *Mlh1* = MutL homologue 1, *Lmo2* = LIM domain only 2, *IL12a* = interleukin-12 alpha, *CDC42ep3* = Cdc42 effector protein 3, *Cdkn1a* = cyclin-dependent kinase inhibitor 1a; *Grb2* = growth factor receptor bound protein 2, *Akt1* = serine/threonine protein kinase 1. (B) Expression of *Jun*, *Atf4* and *Xbp1* in splenic KSL cells from BA mice at 72 hours following treatment with *Jun* siRNA or sham siRNA ( $n=3$  mice/group), Sidak's multiple comparison test for two-way ANOVA. (C) PTN mRNA levels in KSL cells from BA mice at 2 hours following anisomycin – induction of *Jun* expression ( $n=4$ /group). Student's t test. \* $P < 0.05$ , \*\* $P < 0.01$ , \*\*\* $P < 0.001$ .

A

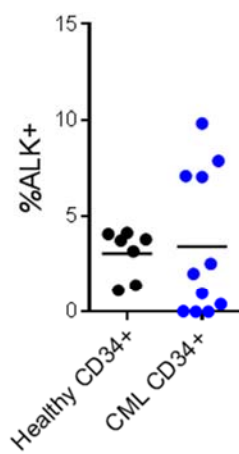

B

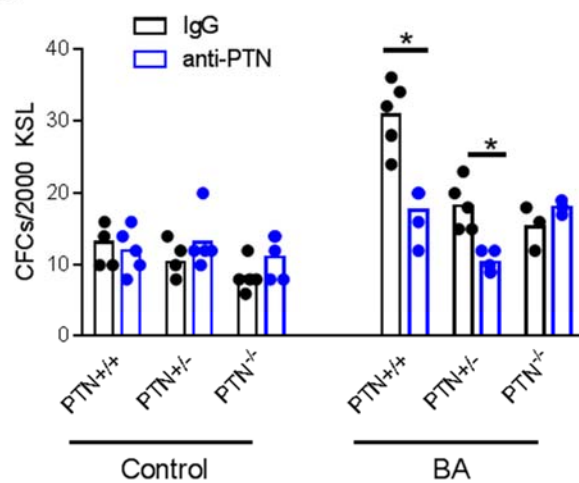

C

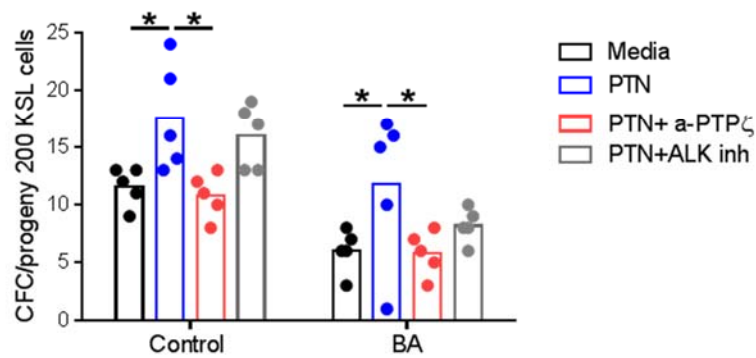

D

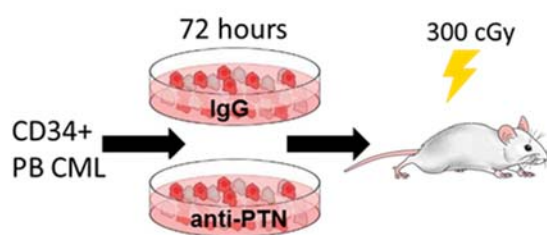

E

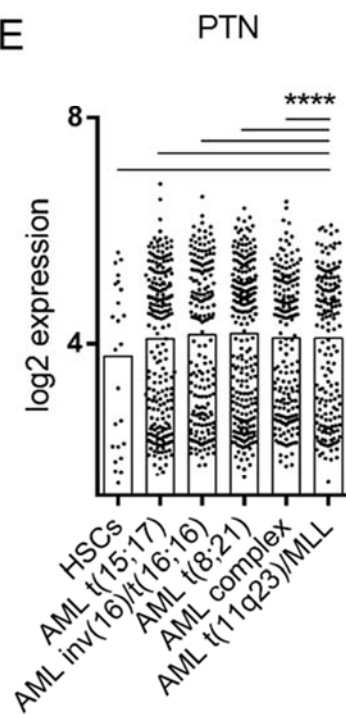

**Supplemental Figure 8. PTN inhibition differentially suppresses CML colony formation.**

(A) Scatter plot of %ALK<sup>+</sup>CD34<sup>+</sup> cells from healthy adults and CML patients ( $n=5$  healthy,  $n=12$  CML). (B) Numbers of CFCs per  $2 \times 10^3$  KSL cells from PTN<sup>-/-</sup>, PTN<sup>+/-</sup> and PTN<sup>+/+</sup> mice (Control) compared to that from the same dose of KSL cells from BA;PTN<sup>-/-</sup>, BA;PTN<sup>+/-</sup> and BA;PTN<sup>-/-</sup> mice, treated with 10  $\mu$ g/ml anti-PTN or IgG ( $n=3-5$ /group). (C) Numbers of CFCs generated from KSL cells from C57BL/6 mice (Control) or BA mice treated with 200 ng/ml PTN with or without 5  $\mu$ g/ml anti-PTP $\zeta$  (a-PTP $\zeta$ ) or 3 nM TAE684 (ALK inh)( $n=5$ /group). (D) Human CML xenotransplantation model in NSG mice. (E) PTN gene expression in human HSPCs ( $n=24$ ), AML t(15;17)( $n=217$ ), AMLinv(16)( $n=189$ ), AML (8;21)( $n=241$ ), AML complex ( $n=192$ ), AML t(11q23)/MLL ( $n=172$ ). Sidak's multiple comparison test for two-way ANOVA for (B) and Dunnett's multiple comparison test for two-way ANOVA for (C). \* $P < 0.05$ , \*\*\*\*  $P < 0.0001$  for normal HSPCs versus each AML subtype.

**Supplemental Table 1. Flow cytometry antibodies**

| <b>Antibody</b>                                            | <b>SOURCE</b>        | <b>Catalog Number</b> |
|------------------------------------------------------------|----------------------|-----------------------|
| <b>Endothelial and Leptin Receptor Cell Identification</b> |                      |                       |
| Anti-mouse VE-Cadherin AF647                               | Biolegend            | 138006                |
| Anti-LEPR / Leptin Receptor Antibody PE                    | LifeSpan Biosciences | LS-C261834            |
| 7-AAD Staining Solution                                    | BD Biosciences       | 559925                |
| <b>Donor/Host Hematopoietic Cell Discrimination</b>        |                      |                       |
| CD45.1 PE Mouse anti-Mouse                                 | BD Biosciences       | 553776                |
| CD45.2 FITC Mouse anti-Mouse                               | BD Biosciences       | 553772                |
| <b>Mature Hematopoietic Lineages Analysis</b>              |                      |                       |
| B220 (CD45R) APC-Cy7 Rat Anti-Mouse                        | BD Biosciences       | 552094                |
| Gr-1 (Ly-6G and Ly-6C) PE Rat anti-Mouse                   | BD Biosciences       | 553128                |
| Mac-1 (CD11b) PE Rat anti-Mouse                            | BD Biosciences       | 557397                |
| CD3 V450 Rat Anti-Mouse Molecular Complex                  | BD Biosciences       | 561389                |
| <b>Hematopoietic Stem and Myeloid Progenitor Analysis</b>  |                      |                       |
| CD41 Alexa Fluor 488 anti-mouse                            | Biolegend            | 133908                |
| CD150 Alexa Fluor 647 Rat anti-Mouse                       | BD Biosciences       | 562647                |
| c-kit (CD117) PE Rat anti-Mouse                            | BD Biosciences       | 553355                |
| Sca-1 (Ly-6A/E) APC-Cy7 Rat anti-Mouse                     | BD Biosciences       | 560654                |
| V450 Mouse Lineage Antibody Cocktail                       | BD Biosciences       | 561301                |
| CD34 FITC                                                  | BD Biosciences       | 553733                |
| CD16/32 (Fc $\gamma$ R III/II) APC                         | Biolegend            | 101325                |
| CD48 AF488                                                 | Biolegend            | HM48-1                |
| <b>Human Hematopoietic Cell Analysis</b>                   |                      |                       |
| Human CD45 V450                                            | BD Biosciences       | 560367                |
| Human CD33 PE                                              | Biolegend            | 366608                |
| <b>p-PERK Analysis</b>                                     |                      |                       |
| Anti-PERK (Phospho T982)                                   | Abcam                | ab192591              |
| Alexa Fluor 488 labeling kit                               | ThermoFisher         | A20181                |
